# Supplementary material for: High performance, recyclable and sustainable by design natural polyphenol-based epoxy polyester thermosets
Source: Royal Society of Chemistry journal article supplement (doi:10.1039/d2gc04414e), 2023-01-01
Supplement: d2gc04414e1.pdf [file d2gc04414e1.pdf]

## **Electronic Supplementary Information**

### **High performant, recyclable and sustainable by design natural polyphenol-based epoxy polyester thermosets**

**Roxana Dinu,<sup>a</sup> Anastasiia Pidvoronia,<sup>a</sup> Ugo Lafont,<sup>b</sup> Olivier Damiano<sup>c</sup> and Alice Mija<sup>\*a</sup>**

<sup>a</sup>Université Côte d'Azur, Institut de Chimie de Nice, France.

<sup>b</sup>ESA, ESTEC, Keplerlaan 1, PO Box 299, NL-2200 AG Noordwijk, The Netherlands.

<sup>c</sup>Thales Alenia Space, 5 Allée des Gabians, 06156 Cannes la Bocca, France.

E-mail : [Alice.Mija@univ-cotedazur.fr](mailto:Alice.Mija@univ-cotedazur.fr)

## 1. Characteristics of anhydrides

Table S1. Physico-chemical characteristics of the selected anhydrides

| Anhydride                                                | Molar mass (g/mol) | Density (g/cm <sup>3</sup> ) | Melting temperature (°C) |
|----------------------------------------------------------|--------------------|------------------------------|--------------------------|
| maleic anhydride (MA)                                    | 98.06              | 1.50                         | 51-56                    |
| succinic anhydride (SA)                                  | 100.07             | 1.50                         | 118-120                  |
| <i>cis</i> -1,2,3,6- tetrahydrophthalic anhydride (THPA) | 152.15             | 1.22                         | 98                       |
| phthalic anhydride (PA)                                  | 148.12             | 1.53                         | 131-134                  |
| 1,2,4-benzenetricarboxylic anhydride (TA)                | 192.13             | 1.54                         | 163-166                  |

## 2. DSC

➤ variation of the TGPh/TGEN ratio :

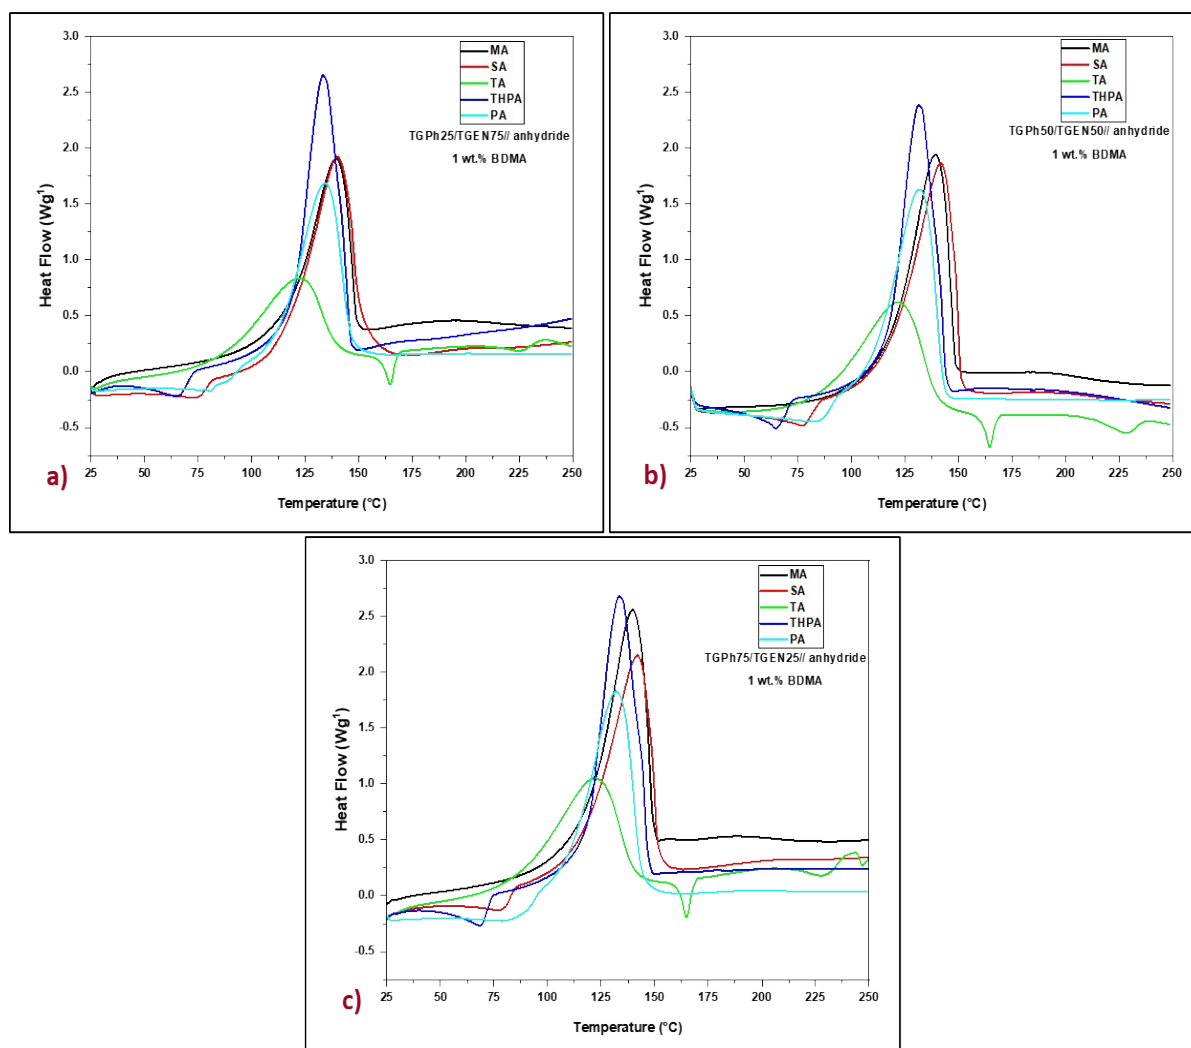

Fig. S1. DSC dynamic curves of the a) TGPh25/TGEN75//anhydride, b) TGPh50/TGEN50//anhydride and c) TGPh75/TGEN25//anhydride formulations during crosslinking initiated by 1 wt.% BDMA

Table S2. DSC data of TGPh/TGEN//anhydride crosslinking systems initiated by 1 wt.% BDMA

| Hardener | Reaction T <sub>max</sub> (interval) (°C) |                     |              | Enthalpy of reaction (J.g <sup>-1</sup> ) |       |            |
|----------|-------------------------------------------|---------------------|--------------|-------------------------------------------|-------|------------|
|          | TGPh/TGEN ratios                          |                     |              | TGPh/TGEN ratios                          |       |            |
|          | 25-75                                     | 50-50               | 75-25        | 25-75                                     | 50-50 | 75-25      |
| MA       | 139 (70-238)                              | <b>139 (69-235)</b> | 140 (64-234) | 244                                       | 317   | <b>341</b> |
| SA       | 140 (74-175)                              | <b>142 (78-163)</b> | 142 (78-166) | 315                                       | 331   | <b>333</b> |
| TA       | 122 (50-156)                              | <b>122 (52-155)</b> | 122 (45-156) | 167                                       | 215   | <b>221</b> |
| THPA     | 134 (65-153)                              | <b>132 (65-151)</b> | 134 (69-152) | 335                                       | 360   | <b>364</b> |
| PA       | 134 (86-233)                              | <b>132 (83-217)</b> | 132 (80-221) | 238                                       | 314   | <b>318</b> |

Table S3. Glass transition values obtained by DSC of TGPh/TGEN crosslinking systems initiated by 1 wt.% BDMA

| Hardener | Glass transition (°C) |            |       |
|----------|-----------------------|------------|-------|
|          | TGPh/TGEN ratios      |            |       |
|          | 25-75                 | 50-50      | 75-25 |
| MA       | 170                   | <b>175</b> | 173   |
| SA       | 140                   | <b>141</b> | 125   |
| TA       | 200                   | <b>210</b> | 197   |
| THPA     | 140                   | <b>148</b> | 135   |
| PA       | 132                   | <b>138</b> | 137   |

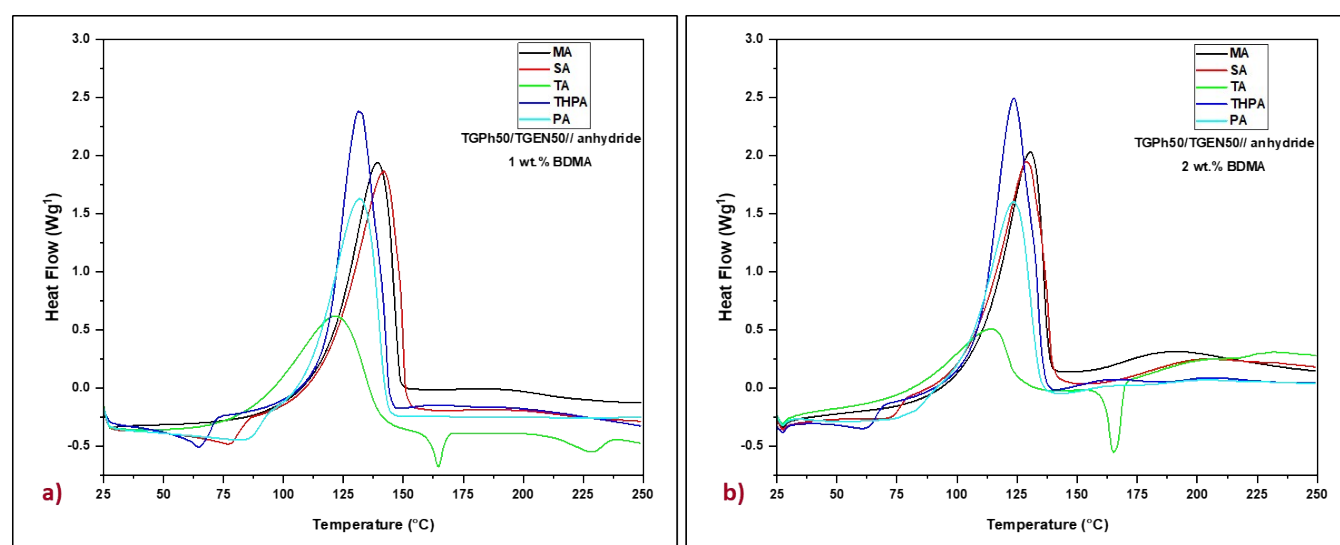

Fig. S2. DSC dynamic curves of TGPh50/TGEN50//anhydride crosslinking initiated by a) 1 wt.% BDMA and b) 2 wt.% BDMA

➤ variation of the initiator percentage

Table S4. Glass transition obtained by DSC for TGPh50/TGEN50//anhydride mixtures initiated by various percentage of BDMA

| Hardener | Glass transition<br>(°C)<br>TGPh50/TGEN50 |            |            |
|----------|-------------------------------------------|------------|------------|
|          | 0.5%<br>BDMA                              | 1%<br>BDMA | 2%<br>BDMA |
| MA       | 180                                       | 175        | 173        |
| SA       | 142                                       | 141        | 118        |
| TA       | 199                                       | 210        | 207        |
| THPA     | 134                                       | 148        | 123        |
| PA       | 149                                       | 138        | 149        |

➤ comparison of mono-epoxy//anhydride formulations vs. TGPh50/TGEN50//anhydride mixture

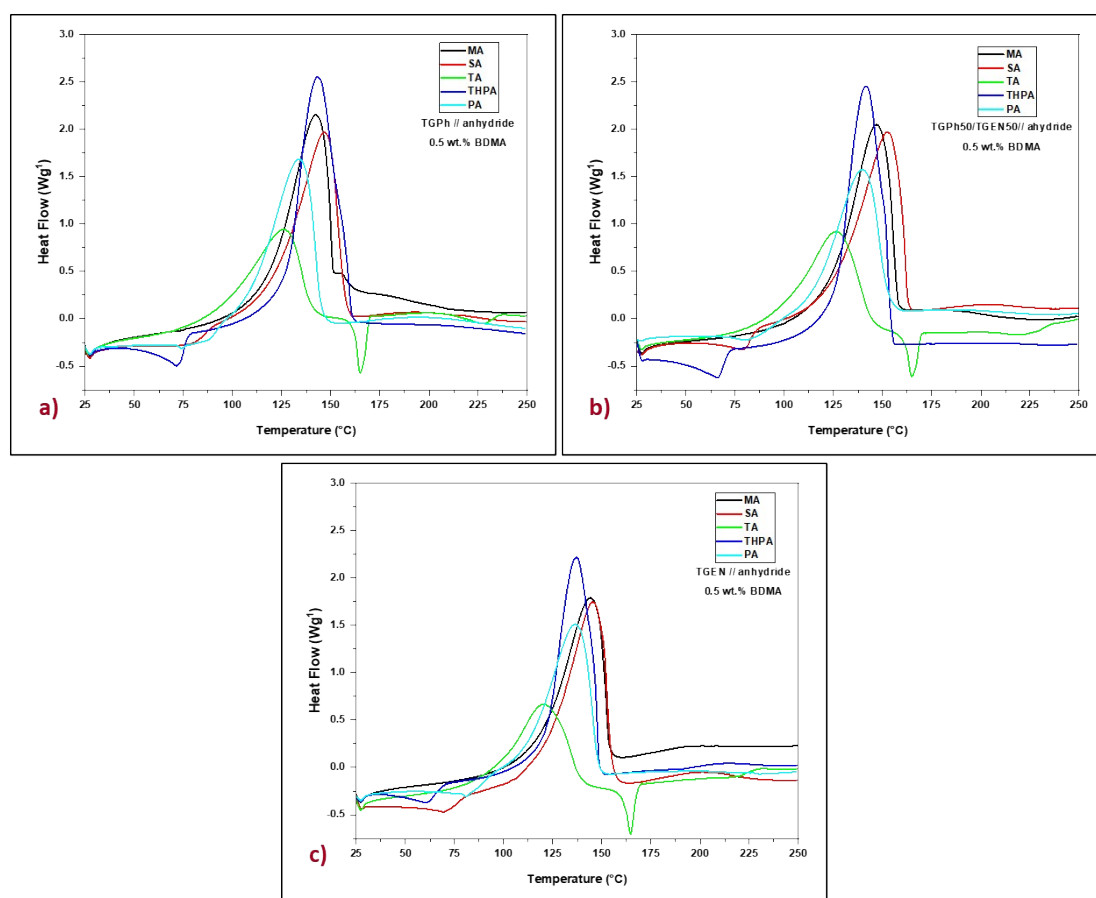

Fig. S3. DSC dynamic curves of the a) 100% TGPh, b) 50-50% TGPh-TGEN and c) 100% TGEN samples crosslinked with various anhydrides and initiated by 0.5 wt.% BDMA

Table S5. DSC data of crosslinking the individual epoxy monomers, and of the TGPh50/TGEN50//anhydride mixture initiated by 0.5 wt.% BDMA

| Hardener | Reaction $T_{max}$ (interval) (°C) |                 |              | Enthalpy of reaction (J.g <sup>-1</sup> ) |                 |      |
|----------|------------------------------------|-----------------|--------------|-------------------------------------------|-----------------|------|
|          | TGPh                               | 50/50 TGPh/TGEN | TGEN         | TGPh                                      | 50/50 TGPh/TGEN | TGEN |
| MA       | 142 (60-230)                       | 147 (60-228)    | 144 (66-242) | 365                                       | 392             | 280  |
| SA       | 147 (75-245)                       | 153 (80-233)    | 146 (69-238) | 392                                       | 487             | 370  |
| TA       | 126 (58-151)                       | 126 (46-158)    | 120 (56-150) | 165                                       | 238             | 150  |
| THPA     | 143 (72-168)                       | 142 (66-162)    | 137 (61-240) | 397                                       | 428             | 377  |
| PA       | 134 (80-240)                       | 140 (81-236)    | 137 (80-240) | 346                                       | 352             | 335  |

Table S6. Glass transition values obtained by DSC for TGPh//anhydride, TGEN//anhydride and TGPh50/TGEN50//anhydride materials (crosslinked with 0.5 wt.% BDMA)

| Hardener | Glass transition (°C) |                 |      |
|----------|-----------------------|-----------------|------|
|          | TGPh                  | 50/50 TGPh/TGEN | TGEN |
| MA       | 128                   | 180             | 190  |
| SA       | 84                    | 142             | 109  |
| TA       | -                     | 199             | 165  |
| THPA     | 126                   | 134             | 107  |
| PA       | 123                   | 149             | 143  |

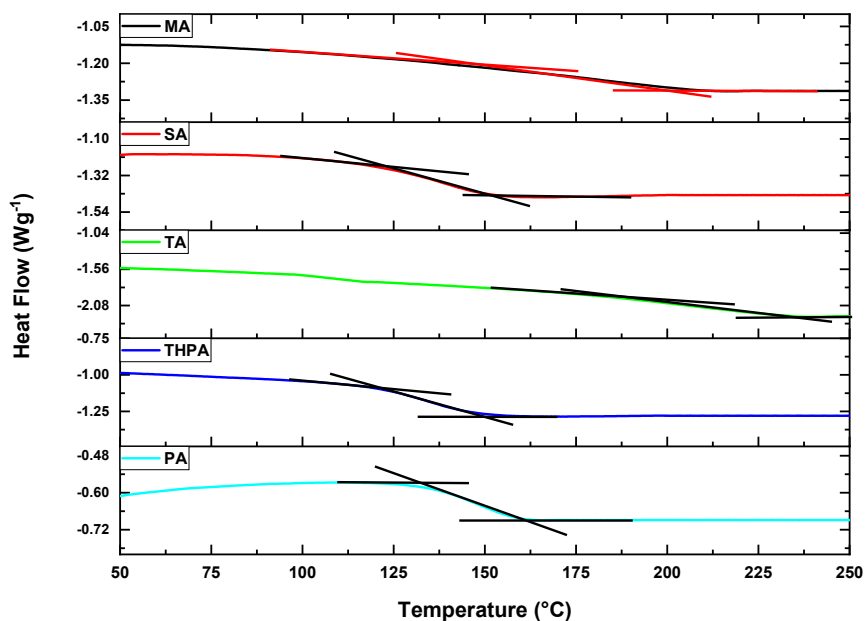

Fig. S4. DSC thermograms showing the glass transitions of TGPh50/TGEN50//anhydride thermostets

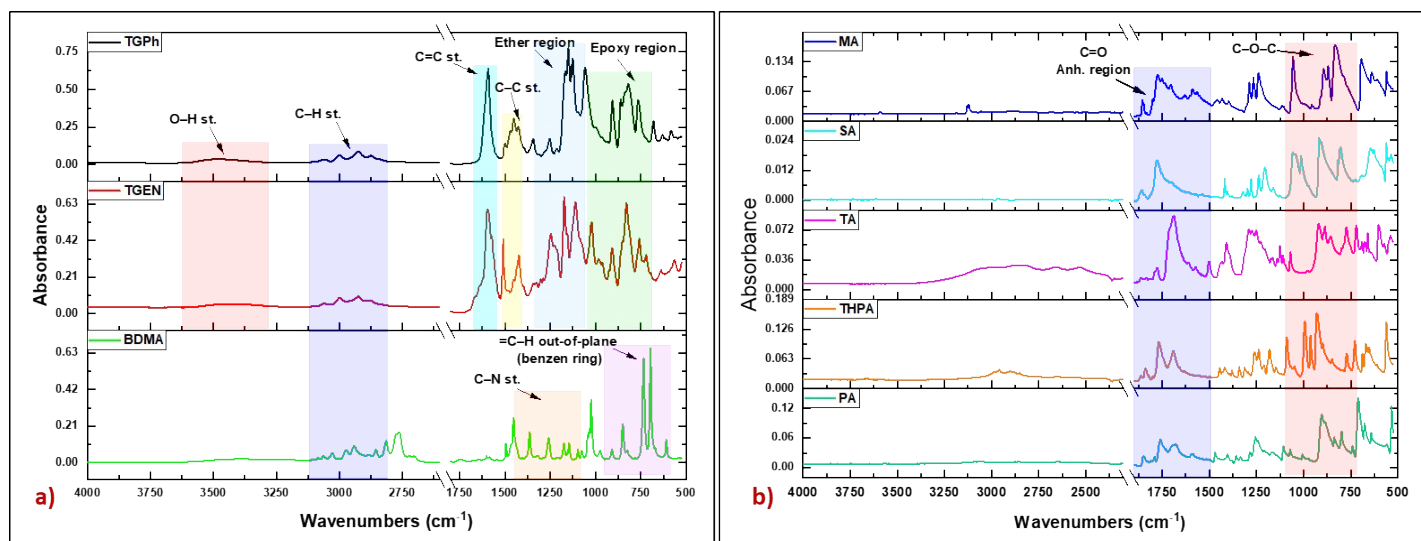

Fig. S5. FT-IR spectra of the raw compounds: a) TGPh, TGEN and BDMA, and b) MA, SA, TA, THPA and PA

### 3. FT-IR spectroscopy

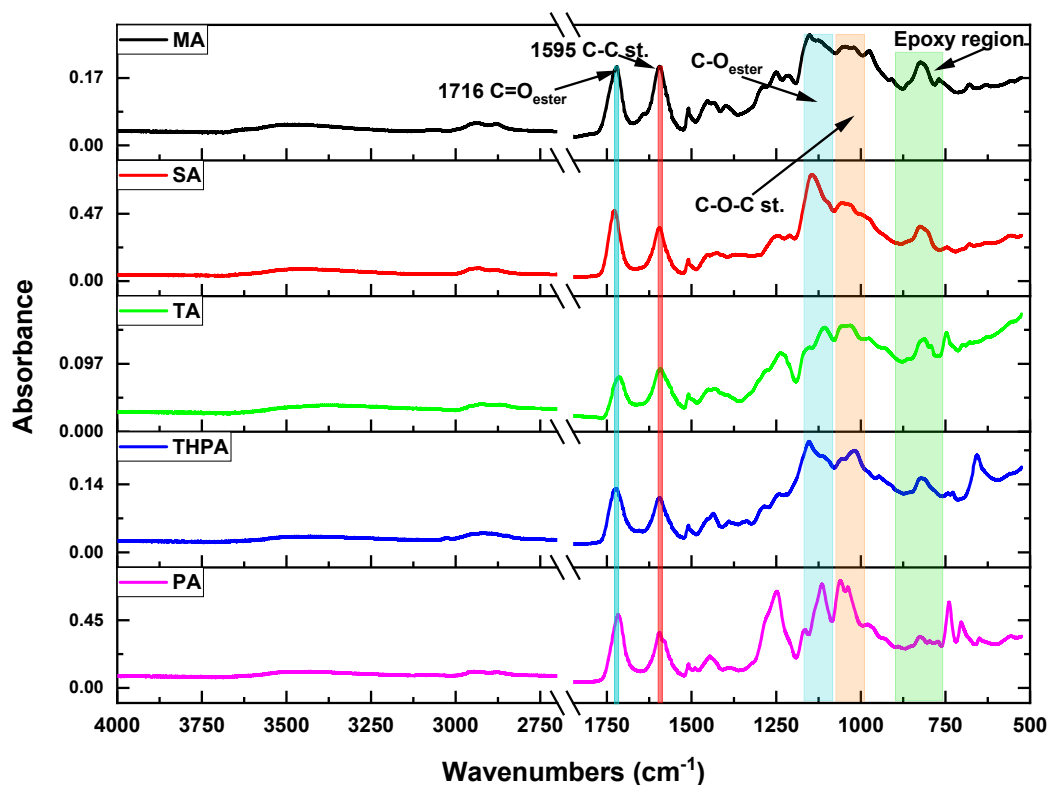

Fig. S6. FT-IR spectra of TGPh50/TGEN50 mixture crosslinked with indicated anhydride

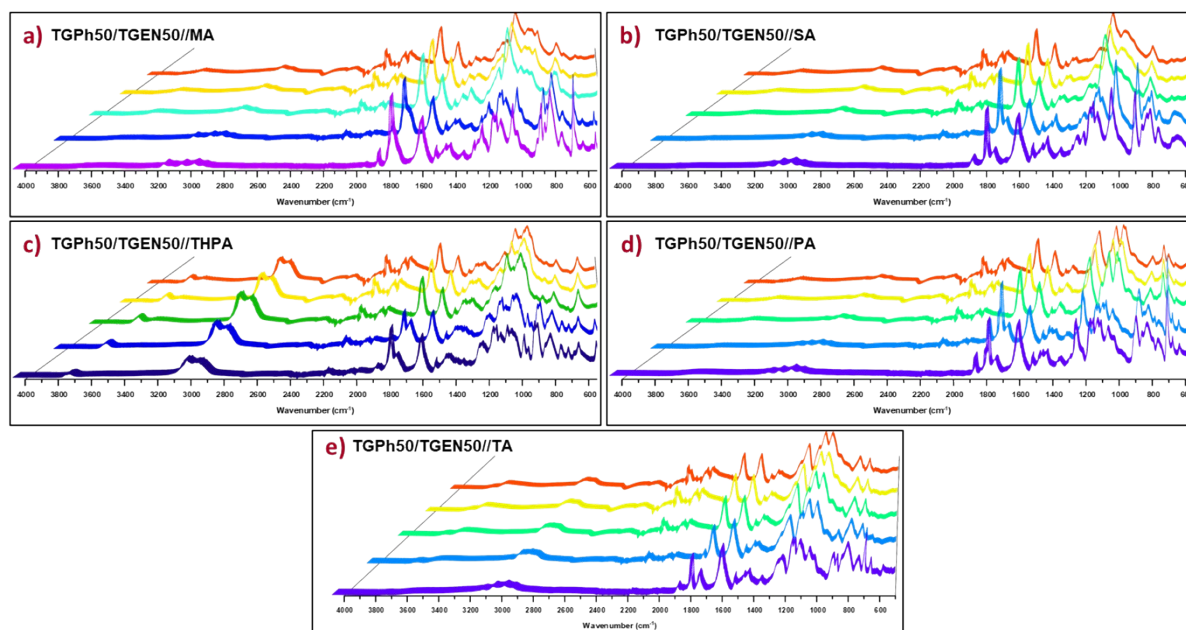

Fig. S7. Temperature-dependent FT-IR spectra during dynamic curing of a) TGPh50/TGEN50//MA, b) TGPh50/TGEN50//SA, c) TGPh50/TGEN50//THPA, d) TGPh50/TGEN50//PA and e) TGPh50/TGEN50//TA systems

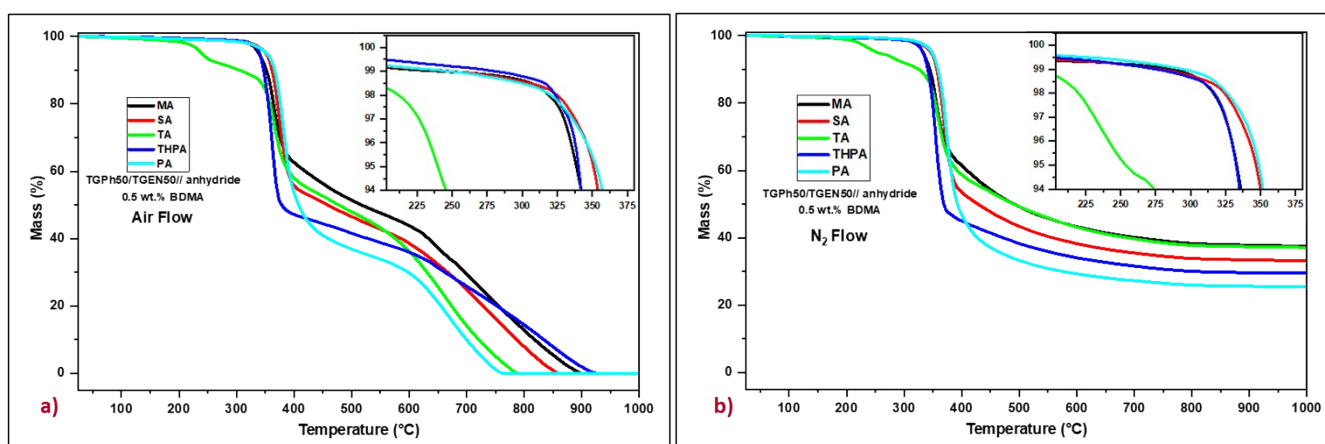

Fig. S8. Thermogravimetric curves of the epoxy/anhydride systems in a) air flow, and b) N<sub>2</sub> flow, at 10 °C/min

## 4. TGA

Table S7. TGA results obtained for the designed bio-based epoxy/anhydride thermosets

| Thermosets          | $T_{1\%}$ (°C) |                | $T_{5\%}$ (°C) |                | $T_{30\%}$ (°C) |                | $T_{dmax}$ (°C) |                | $T_s$ |                | $C_{Y850}$ (%) |                | LOI (%) |                |
|---------------------|----------------|----------------|----------------|----------------|-----------------|----------------|-----------------|----------------|-------|----------------|----------------|----------------|---------|----------------|
|                     | Air            | N <sub>2</sub> | Air            | N <sub>2</sub> | Air             | N <sub>2</sub> | Air             | N <sub>2</sub> | Air   | N <sub>2</sub> | Air            | N <sub>2</sub> | Air     | N <sub>2</sub> |
| TGPh50/TGEN50//MA   | 241            | 281            | 335            | 335            | 375             | 370            | 369             | 357            | 176   | 175            | 5.3            | 38             | N/A     | 32.7           |
| TGPh50/TGEN50//SA   | 241            | 271            | 355            | 340            | 380             | 375            | 379             | 369            | 181   | 177            | 0.7            | 33.6           | N/A     | 30.9           |
| TGPh50/TGEN50//TA   | 300            | 192            | 335            | 351            | 370             | 365            | 369             | 360            | 174   | 176            | 0              | 37.5           | N/A     | 32.5           |
| TGPh50/TGEN50//THPA | 275            | 271            | 345            | 335            | 360             | 355            | 359             | 350            | 174   | 170            | 7.8            | 29.8           | N/A     | 29.4           |
| TGPh50/TGEN50//PA   | 245            | 291            | 355            | 340            | 385             | 375            | 379             | 370            | 183   | 177            | 0              | 25.7           | N/A     | 27.8           |

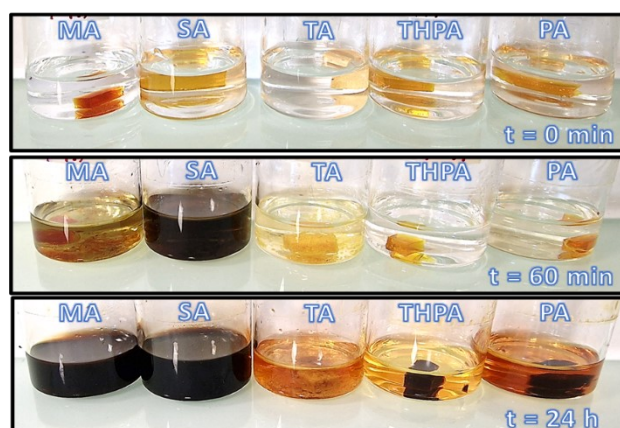

Fig. S9. Physical appearance of the thermosets transesterification when immersed in EG at 170 °C

## 7. Chemical recycling

### Epoxy-anhydride mechanism of curing in presence of tertiary amine initiator<sup>1, 2, 3</sup>

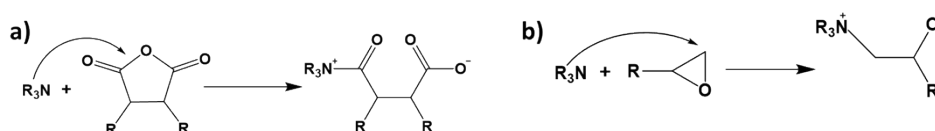

#### A) Chain-wise alternant anionic copolymerization

I/ Initiation step : nucleophilic attack of tertiary amine on cyclic anhydride (a) or on oxirane ring (b)

II/ Propagation

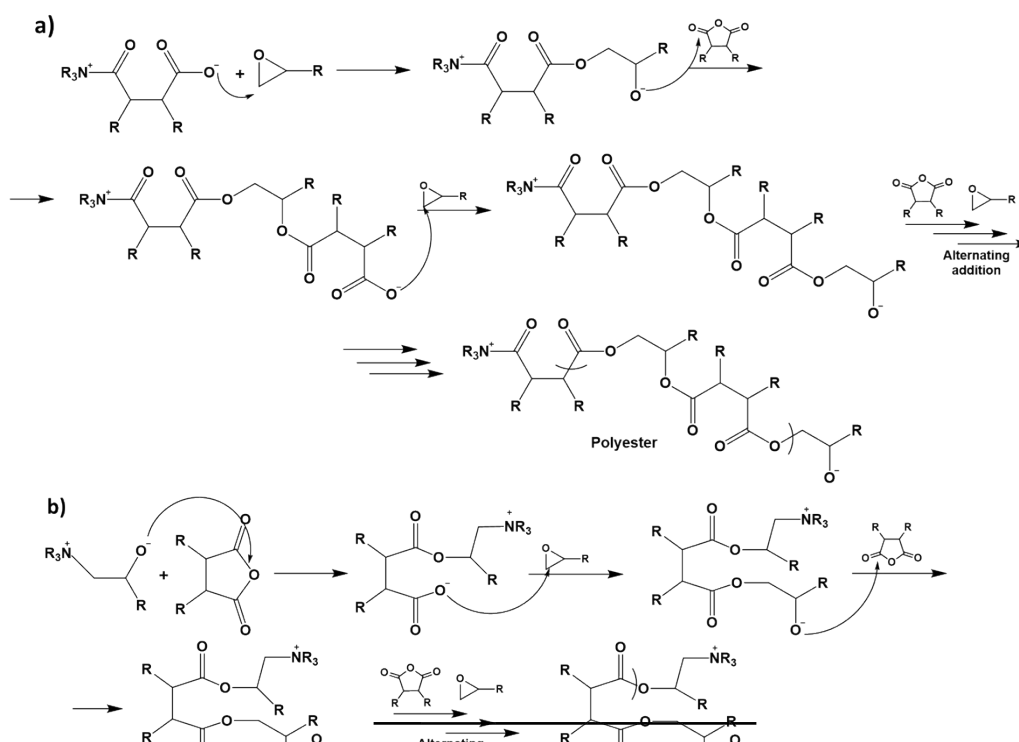

<sup>1</sup> A. N. Mauri, N. Galego, C. Ricardi, R. J. Williams, *Macromolecules*, **1997**, *30*, 1616-1620

<sup>2</sup> X. Fernandez-Francos, X. Ramis, A. Serra, *Polymer Chemistry*, **2014**, *52*, 61-75

<sup>3</sup> T. Vidil, F. Tournilhac, S. Musso, A. Robisson, L. Leibler, *Progress Polymer Science*, **2016**, *62*, 126-179



### III/ Initiator regeneration and termination of chain-wise anionic polymerization

- by unimolecular elimination followed by transfer proton:

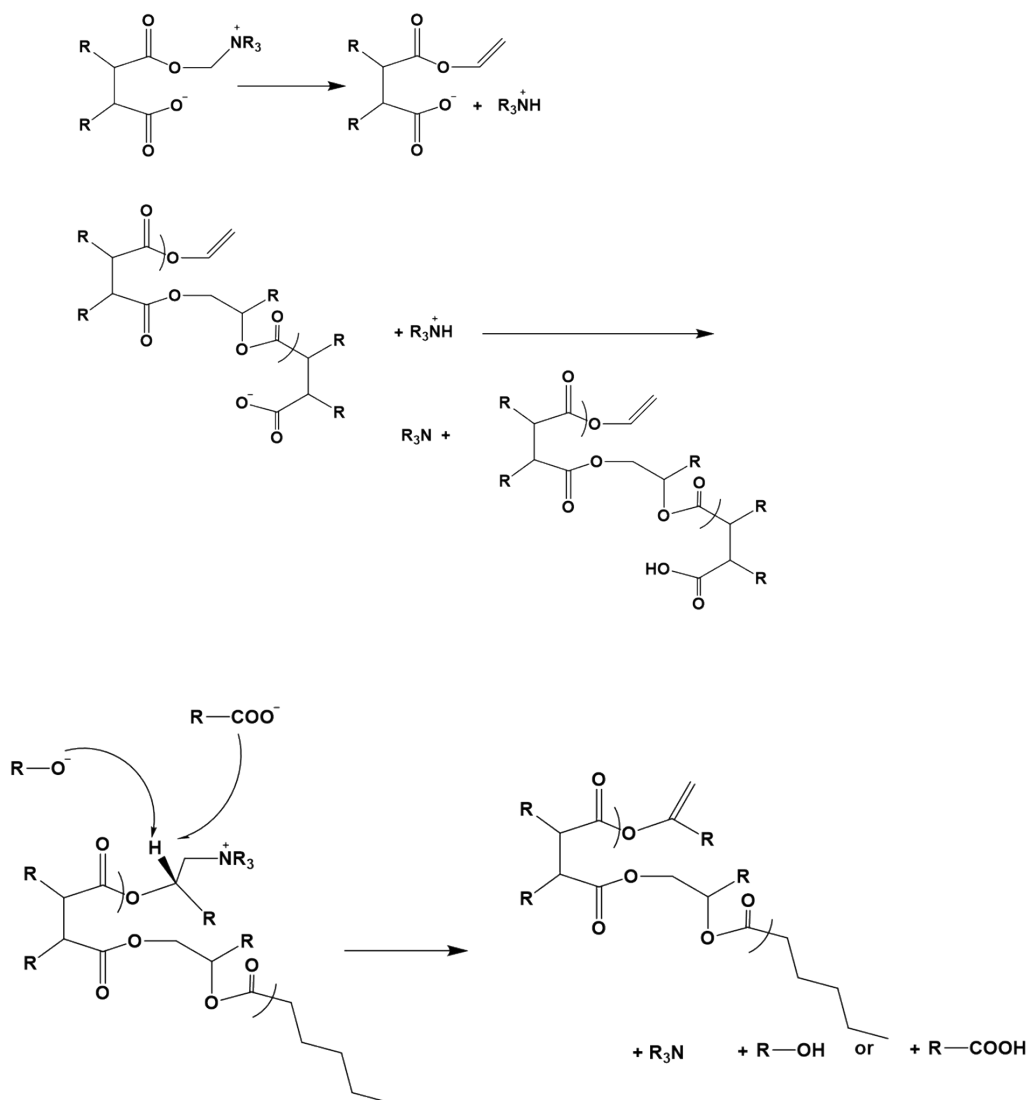

- by attack of carboxylate or alkoxide anions with hydrogen abstract

### B) Step growth polymerizations:

- polyetherification : reaction of hydroxyl groups with epoxy groups

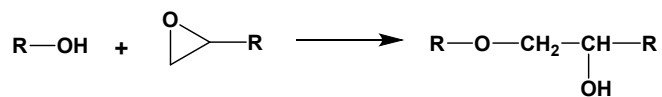

- polyesterification : reaction of hydroxyl groups with anhydrides

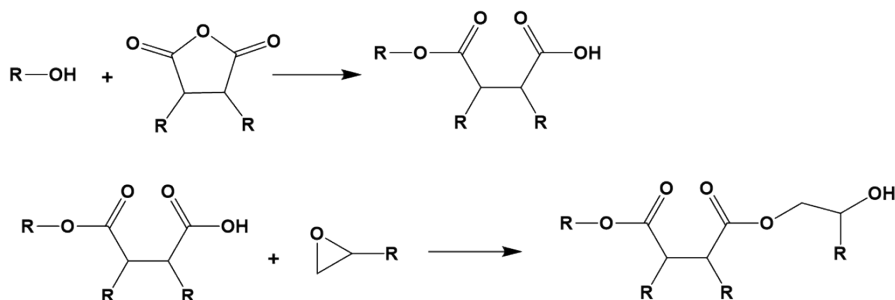

**Scheme S1. A) Chain-wise anionic alternant epoxy-anhydride copolymerization; B) Step growth epoxy-anhydride polyaddition**
